# Supplementary material for: The Semanticscience Integrated Ontology (SIO) for biomedical research and knowledge discovery
Source: Springer Nature journal article supplement (doi:10.1186/2041-1480-5-14), 2014-03-06
Supplement: 13326_2013_202_MOESM5_ESM.pdf [file 13326_2013_202_MOESM5_ESM.pdf]

'methane'

equivalentClass

'molecule'

and 'has component part' exactly 4 'methane hydrogen atom'

and 'has component part' exactly 1 'methane carbon atom'

and 'has component part' only

( 'part of' some 'methane carbon atom' or 'part of' some 'methane hydrogen atom' )

'methane hydrogen atom'

equivalentClass

'hydrogen atom'

and 'is component part of' exactly 1 'methane'

and 'is covalently connected to' exactly 1 'methane carbon atom'

'methane carbon atom'

equivalentClass

'carbon atom'

and 'is component part of' exactly 1 'methane'

and 'is covalently connected to' exactly 4 'methane hydrogen atom'
