# Supplementary material for: The Semanticscience Integrated Ontology (SIO) for biomedical research and knowledge discovery
Source: PubMed Central journal article supplement (PMC4015691; doi:10.1186/2041-1480-5-14), 2014-03-06
Supplement: 13326_2013_202_MOESM6_ESM.pdf [file 13326_2013_202_MOESM6_ESM.pdf]

'substrate-enzyme phosphorylation by ATP'

equivalentClass

'biochemical reaction'

and 'realizes' some

( 'substrate role' and 'is role of' some 'ATP-substrate enzyme complex' )

and 'realizes' some

( 'product role' and 'is role of' some 'ADP-substrate-phosphorylated-enzyme complex' )
