# Supplementary material for: The Semanticscience Integrated Ontology (SIO) for biomedical research and knowledge discovery
Source: Springer Nature journal article supplement (doi:10.1186/2041-1480-5-14), 2014-03-06
Supplement: 13326_2013_202_MOESM8_ESM.pdf [file 13326_2013_202_MOESM8_ESM.pdf]

'enzyme-encoding gene'

subclassOf

'gene'

and 'encodes' some

('protein' and 'has function' some 'to covalently modify'

and 'in relation to' some 'chemical entity'

and 'is realized in' some 'chemical reaction')
