# Supplementary material for: The Semanticscience Integrated Ontology (SIO) for biomedical research and knowledge discovery
Source: Springer Nature journal article supplement (doi:10.1186/2041-1480-5-14), 2014-03-06
Supplement: 13326_2013_202_MOESM9_ESM.pdf [file 13326_2013_202_MOESM9_ESM.pdf]

```
'phenotype of an organism with a SNP at position 12'  
  
subclassOf  
'phenotype'  
and 'is attribute of' some  
  ('organism' that 'has part' some (  
    'gene'  
    and 'has part' some (  
      'snp'  
      and 'has value' value 'A'  
      and ('has attribute' some (  
        'sequence position' that 'has value' value '12')))))
```
