# Supplementary material for: The Semanticscience Integrated Ontology (SIO) for biomedical research and knowledge discovery
Source: Springer Nature journal article supplement (doi:10.1186/2041-1480-5-14), 2014-03-06
Supplement: 13326_2013_202_MOESM11_ESM.pdf [file 13326_2013_202_MOESM11_ESM.pdf]

```
sio: <http://semanticscience.org/resource/>
obo: <http://purl.obolibrary.org/obo/>
taxon: <http://bio2rdf.org/taxon:>

:p rdfs:label "Rob" . # Rob
:p a taxon:9606 . # Rob is human, as per the NCBI taxonomy in
Bio2RDF
:p sio:has-attribute :ml . # Rob has an attribute ml

:ml rdfs:label "Rob's mass on Jan 15, 2012"@en # Rob's mass
:ml a sio:mass . # ml is a mass
:ml sio:has-value "74.5"^^xsd:float . # the value is 74.5
:ml sio:has-unit obo:UO_0000009 . # the unit is kilogram as
# per the Unit Ontology
:ml sio:measured-at :t1 . # mass measured at t1

:t1 a sio:time-instant .
:t1 sio:has-value "2012-01-15T12:03:00-05:00"^^xsd:dateTime .

:mp a sio:measuring . # measuring process
:mp sio:has-agent :robscale . # measuring involved rob's scale
:mp sio:has-output :ml . # measuring resulted in a measurement value

:robscale rdfs:label "Rob's scale"@en # Rob's scale
:robscale a obo:MMO_0000217 . # body measurement scale as per the Measurement
# Method Ontology
```
