# Supplementary material for: The Semanticscience Integrated Ontology (SIO) for biomedical research and knowledge discovery
Source: Springer Nature journal article supplement (doi:10.1186/2041-1480-5-14), 2014-03-06
Supplement: 13326_2013_202_MOESM12_ESM.pdf [file 13326_2013_202_MOESM12_ESM.pdf]

```

SELECT ?go ?label count(distinct ?x)
WHERE {
  {
    # get all the biochemical reactions labelled with protein catabolic process
    ?go rdfs:label ?label .
    FILTER regex(?label, "^protein catabolic process")
    SERVICE <http://biomodels.bio2rdf.org/sparql> {
      ?x <http://semanticscience.org/resource/is-identical-to> ?go .
      ?x a <http://semanticscience.org/resource/biochemical-reaction>
    } # end service
  } UNION {
    # get all the biochemical reactions that are
    # more specific than "protein catabolic process"
    ?go rdfs:label ?label .
    ?go rdfs:subClassOf+ ?tgo . # get all the subclasses of the target to term
    ?tgo rdfs:label ?tlabel .
    FILTER regex(?tlabel, "^protein catabolic process")
    SERVICE <http://biomodels.bio2rdf.org/sparql> {
      ?x < http://semanticscience.org/resource/is-identical-to> ?go .
      ?x a < http://semanticscience.org/resource/biochemical-reaction>
    } # end service
  } # end union
} # end where

```
