# Supplementary material for: The Semanticscience Integrated Ontology (SIO) for biomedical research and knowledge discovery
Source: Springer Nature journal article supplement (doi:10.1186/2041-1480-5-14), 2014-03-06
Supplement: 13326_2013_202_MOESM13_ESM.pdf [file 13326_2013_202_MOESM13_ESM.pdf]

```
PREFIX sio: <http://semanticscience.org/resource/>
PREFIX kegg: <http://lsrn.org/KEGG_PATHWAY:>
SELECT ?participant ?protein ?chemical
WHERE {
kegg:hsa00232 sio:SIO_000132 ?gene . # caffeine_metabolism has-participant?gene
?gene sio:SIO_010078 ?protein . # ?gene encodes ?protein
}
```
