# Supplementary material for: The Semanticscience Integrated Ontology (SIO) for biomedical research and knowledge discovery
Source: Springer Nature journal article supplement (doi:10.1186/2041-1480-5-14), 2014-03-06
Supplement: 13326_2013_202_MOESM14_ESM.pdf [file 13326_2013_202_MOESM14_ESM.pdf]

```
@prefix nanopub: <http://www.nanopub.org/nschema#> .
@prefix rdfs: <http://www.w3.org/2000/01/rdf-schema#> .
@prefix sio: <http://semanticscience.org/resource/> .
@prefix xsd: <http://www.w3.org/2001/XMLSchema#> .
@prefix :
<http://rdf.biosemantics.org/vocabularies/gene_disease_nanopub_example#> .

:NanoPub_1_Assertion {
  :Association_1
    a sio:gene-disease-association ;
    sio:has-measurement-value :Association_1_p_value ;
    sio:refers-to <http://bio2rdf.org/ncbigene:55835>,
<http://bio2rdf.org/omim:210600> ;
    rdfs:comment "This association has p-value of 0.00066, has attribute gene
CENPJ (NCBI gene id 55835) and attribute disease Seckel Syndrome (OMIM
210600)."@en .

  :Association_1_p_value
    a sio:probability-value ;
    sio:has-value "0.0000656211037469712"^^xsd:float .
}
```
